# MIND TO MIND

Creative writing that explores the abstract side of our profession and our lives

*Stephen T. Harvey, M.D., Editor*

## Morning in the Surgical Waiting Area

Donna Doyle

We drove through darkness, sky spread thick  
with constellations, stories of immortals  
stolen by artificial light. Now this glare  
installed without thought of our need to move  
slowly toward illumination—to witness faces  
tired as ours, magazines crumpled by multitudes,  
furniture scuffed and dull, burdened by so much  
waiting. For as long as possible we delay  
closing our eyes, moments when blindness  
renders us better listeners. Around the room  
lullabies hum, names of patients called  
to endure another kind of sleep.

*I love you...I love you...I love you*  
trails like stars falling, landing lightly  
on our laps, scattering our histories,  
legends of mortals left in our keeping.

---

This poem is one of the finalists of ANESTHESIOLOGY's 2018 annual creative writing competition, The Letheon. donnajodyle@gmail.com

Permission to reprint granted to the American Society of Anesthesiologists, Inc., and Wolters Kluwer Health, Inc., by copyright author/owner. Anesthesiology 2019; 130:502
